# Supplementary material
Source: PubMed Central journal article supplement (PMC7370365)
Supplement: sj-pdf-1-jcb-10.1177_0271678X20921974.pdf [file sj-pdf-1-jcb-10.1177_0271678X20921974.pdf]

**Supplement 1.** Temporal and spatial findings of microvascular thrombosis in experimental models of SAH.

| <b>Study</b>                   | <b>SAH Induction Method</b> | <b>Animal</b> | <b>Times Examined (post-SAH)</b> | <b>Location of Microvascular Thrombi</b>                      |
|--------------------------------|-----------------------------|---------------|----------------------------------|---------------------------------------------------------------|
| <i>Jeon et al., 2010</i>       | Prechiasmatic Injection     | Rat           | 8 days                           | <b>Cortex and cerebellum</b>                                  |
| <i>Friedrich et al., 2012</i>  | Endovascular Perforation    | Mouse         | 3 hours                          | <b>Cortex (pial arterioles)</b>                               |
| <i>Pisapia et al., 2012</i>    | Endovascular Perforation    | Mouse         | 24, 48, 72, and 96 hours         | <b>Ipsilateral and contralateral cortex, peak at 48 hours</b> |
| <i>Sabri et al., 2012</i>      | Prechiasmatic Injection     | Mouse         | 48 hours                         | <b>Cortex and hippocampus</b>                                 |
| <i>Andereggen et al., 2014</i> | Cisterna Magna Injection    | Rabbit        | 24 hours                         | <b>Cortex and hippocampus</b>                                 |
| <i>Muroi et al., 2014</i>      | Endovascular Perforation    | Mouse         | 24, 48, and 72 hours             | <b>Cortex and hippocampus, peak at 48-72 hours</b>            |
| <i>Vergouwen et al., 2014</i>  | Prechiasmatic Injection     | Mouse         | 48 hours                         | <b>Cortex and hippocampus</b>                                 |
| <i>Milner et al., 2015</i>     | Endovascular Perforation    | Mouse         | 72 hours                         | <b>Cortex</b>                                                 |
| <i>Wang et al., 2018</i>       | Cisterna Magna Injection    | Rat           | 24 hours                         | <b>Cortex (cortical capillaries)</b>                          |

## **Supplement 2. Search Strategy**

Our initial search strategy for this review is as follows: (((microcirculation) OR (“microscopy, electron” [MeSH Terms] OR “electron microscopy” [All Fields])) OR (“Cerebrovascular Disorders” [MeSH: NoExp] OR intracranial thrombosis))) AND subarachnoid hemorrhage. Filters: Publication date from 1970/01/01 to 2017/12/31; English. Our search was later expanded to include the year 2018. From here, studies were then chosen by two separate authors, first by title criteria, then abstract, and finally content. Studies were only chosen if they specifically discussed microvascular platelet aggregation or thrombosis in the context of subarachnoid hemorrhage.
